# Supplementary material
Source: publisher figshare collection journal article supplement (https://acs.figshare.com/ndownloader/files/38946395)
Supplement: Supplementary file 1 [file 38946395]

## **Supporting Information**

### **Raman Spectroscopy Signatures of Boron-Rich Superhard Materials from Density Functional Theory**

Yi He<sup>1</sup>, Yidi Shen<sup>2</sup>, Bin Tang<sup>1\*</sup>, Qi An<sup>2\*</sup>

<sup>1</sup>State Key Laboratory of Electronic Thin Films and Integrated Devices, University of  
Electronic Science and Technology of China, Chengdu, 610054, China

<sup>2</sup>Department of Materials Science and Engineering, Iowa State University, Ames, Iowa,  
50011, United States

\*Correspondence emails: [qan@iastate.edu](mailto:qan@iastate.edu); [tangbin@uestc.edu.cn](mailto:tangbin@uestc.edu.cn)

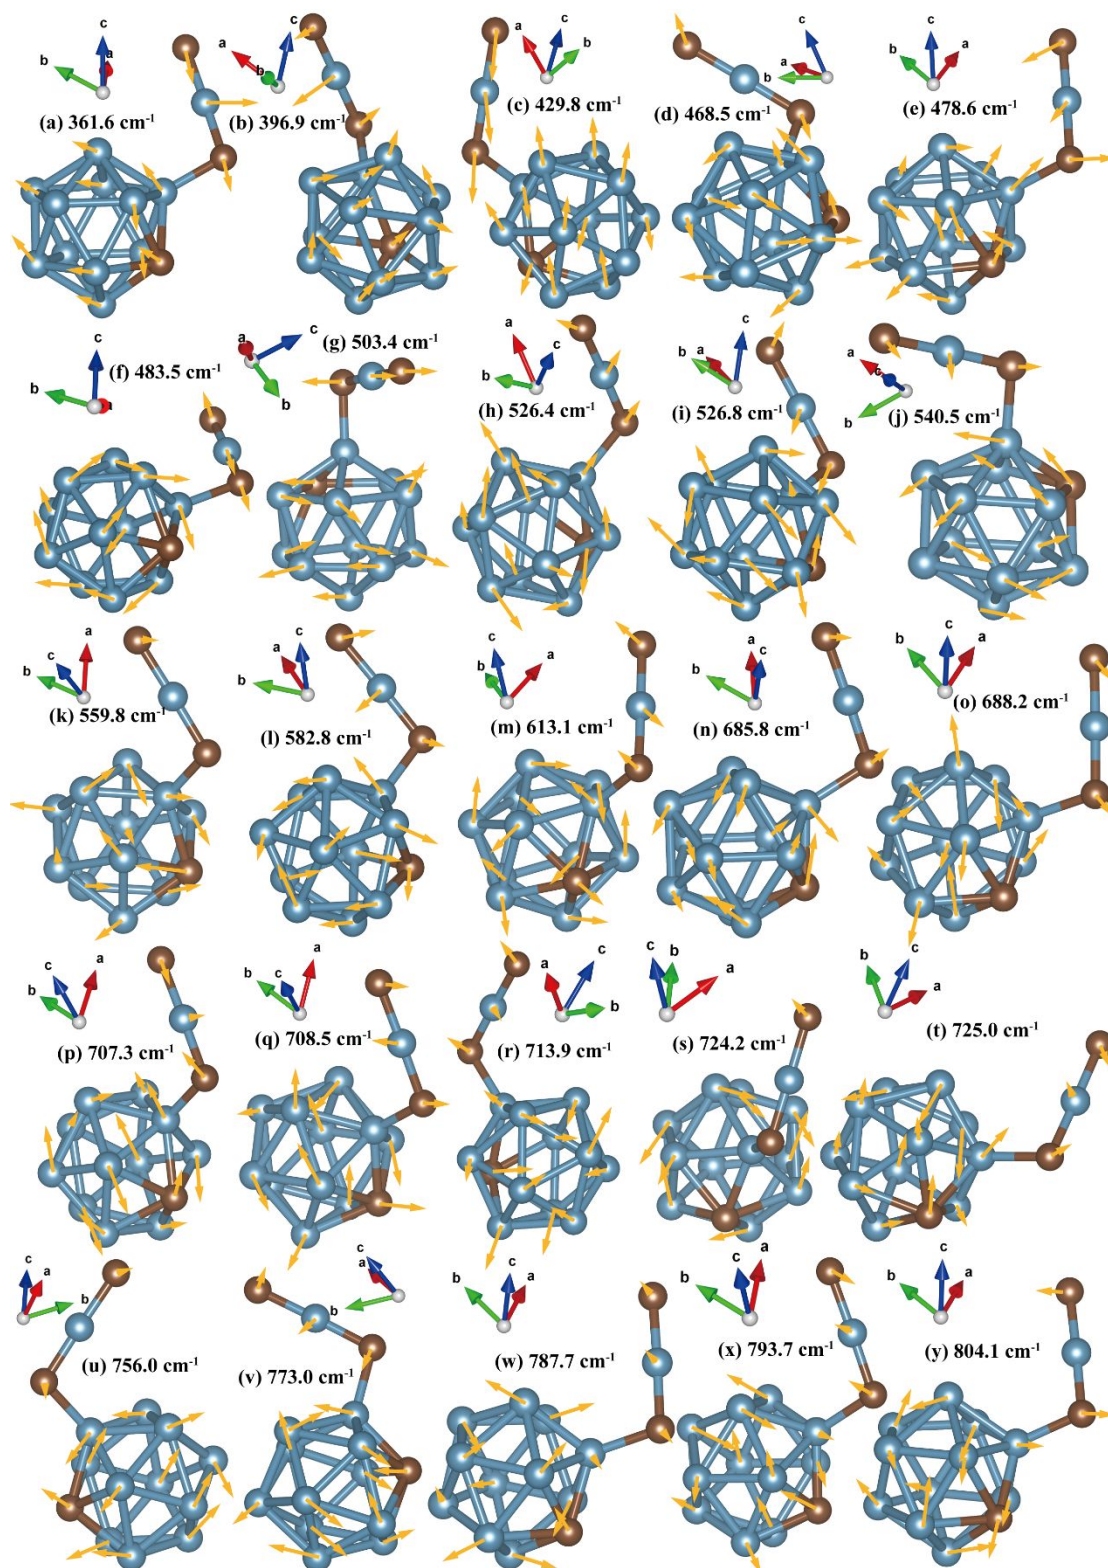

**Figure S1.** Calculated Raman modes and frequencies (range from 361.6  $\text{cm}^{-1}$  to 804.1  $\text{cm}^{-1}$ ) of  $\text{B}_4\text{C}$  crystal. Atom color scheme: B: blue, C: sienna.

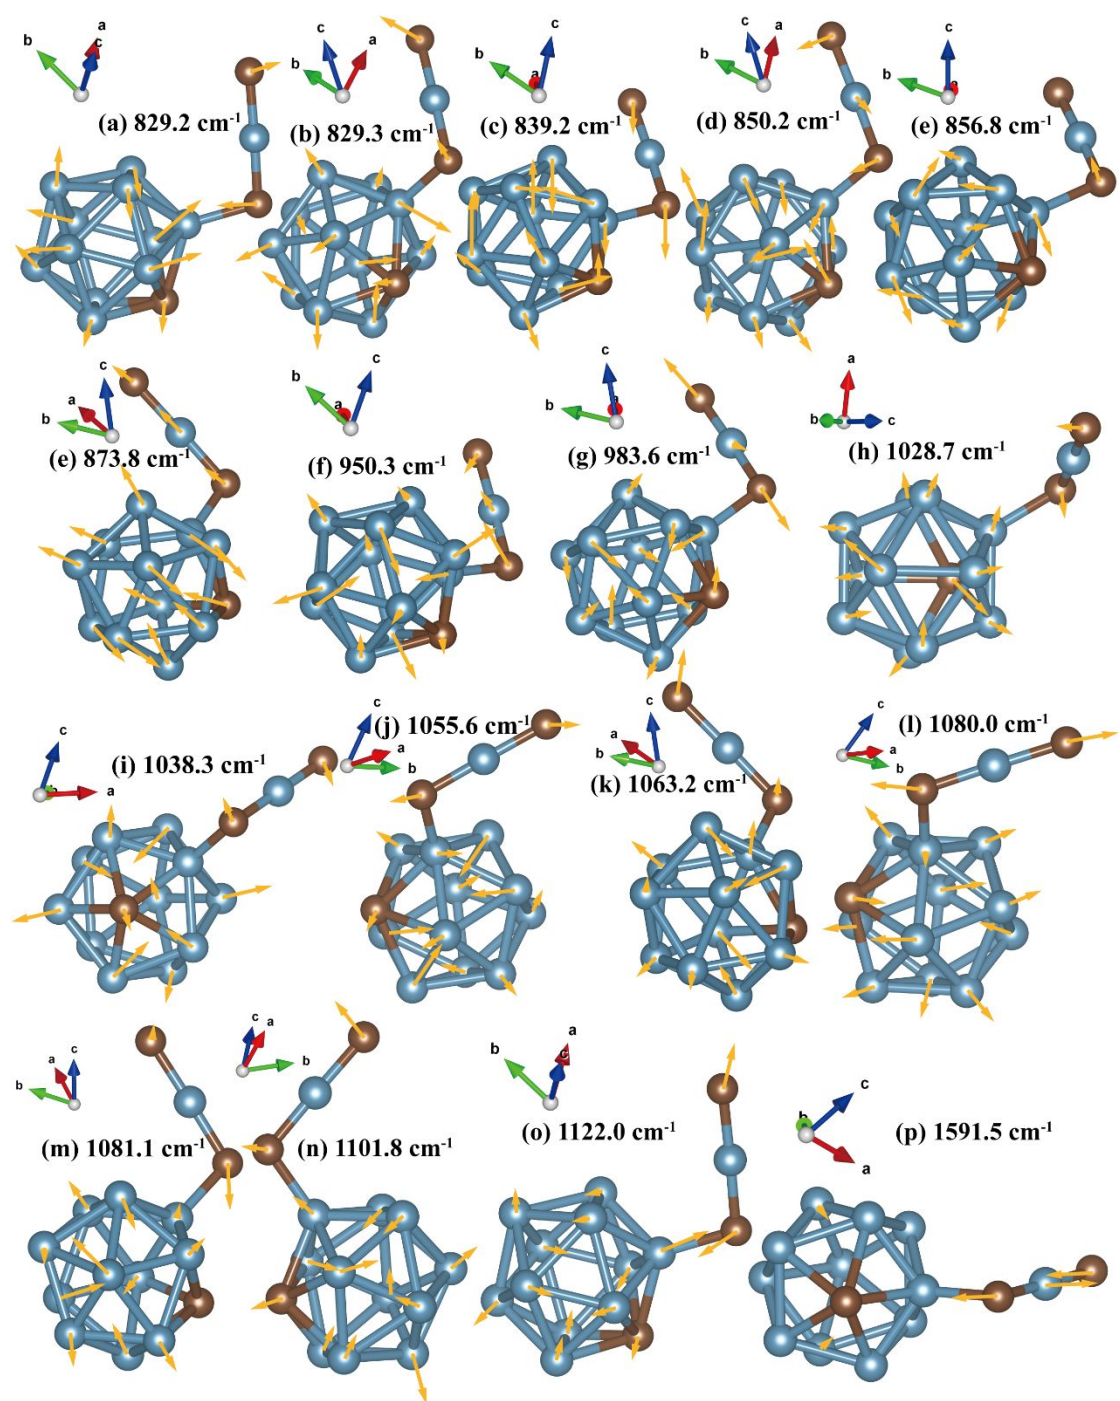

**Figure S2.** Calculated Raman modes and frequencies (range from 829.2  $\text{cm}^{-1}$  to 1591.5  $\text{cm}^{-1}$ ) of  $\text{B}_4\text{C}$  crystal. Atom color scheme: B: blue, C: sienna.

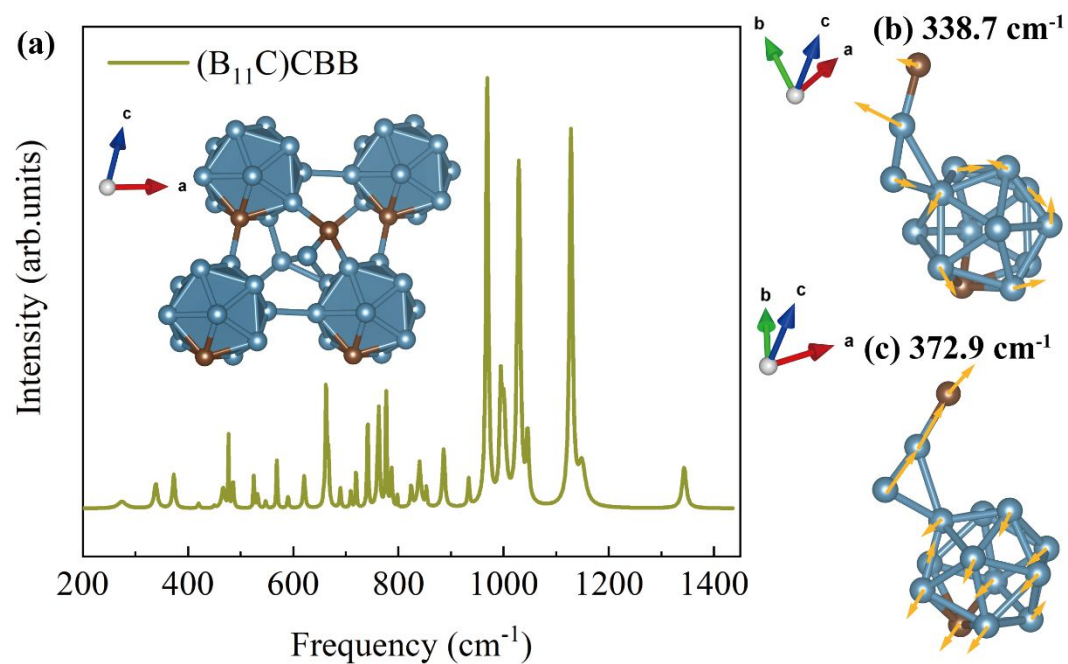

**Figure S3.** (a) The Raman spectrum and the crystal structure of (B<sub>11</sub>C)C-B-B; (b) Calculated Raman modes at 338.7 cm<sup>-1</sup> and 372.9 cm<sup>-1</sup> of (B<sub>11</sub>C)C-B-B crystal. Atom color scheme: B: blue, C: sienna.



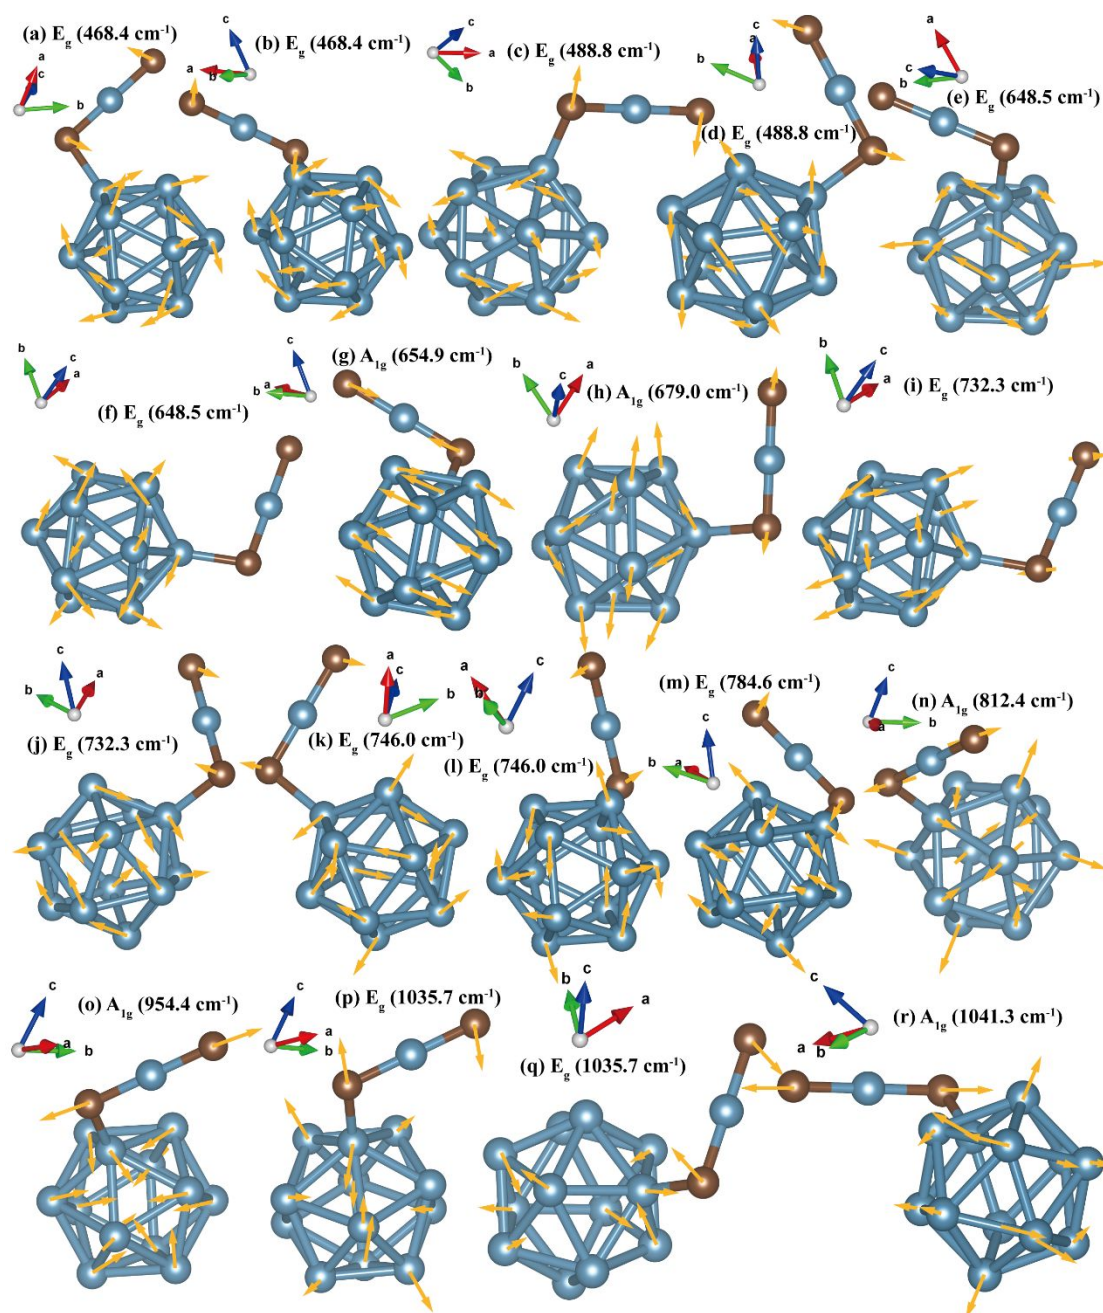

**Figure S4.** Calculated Raman modes and frequencies of  $(B_{12})CBC$  crystal. Atom color scheme: B: blue, C: sienna.

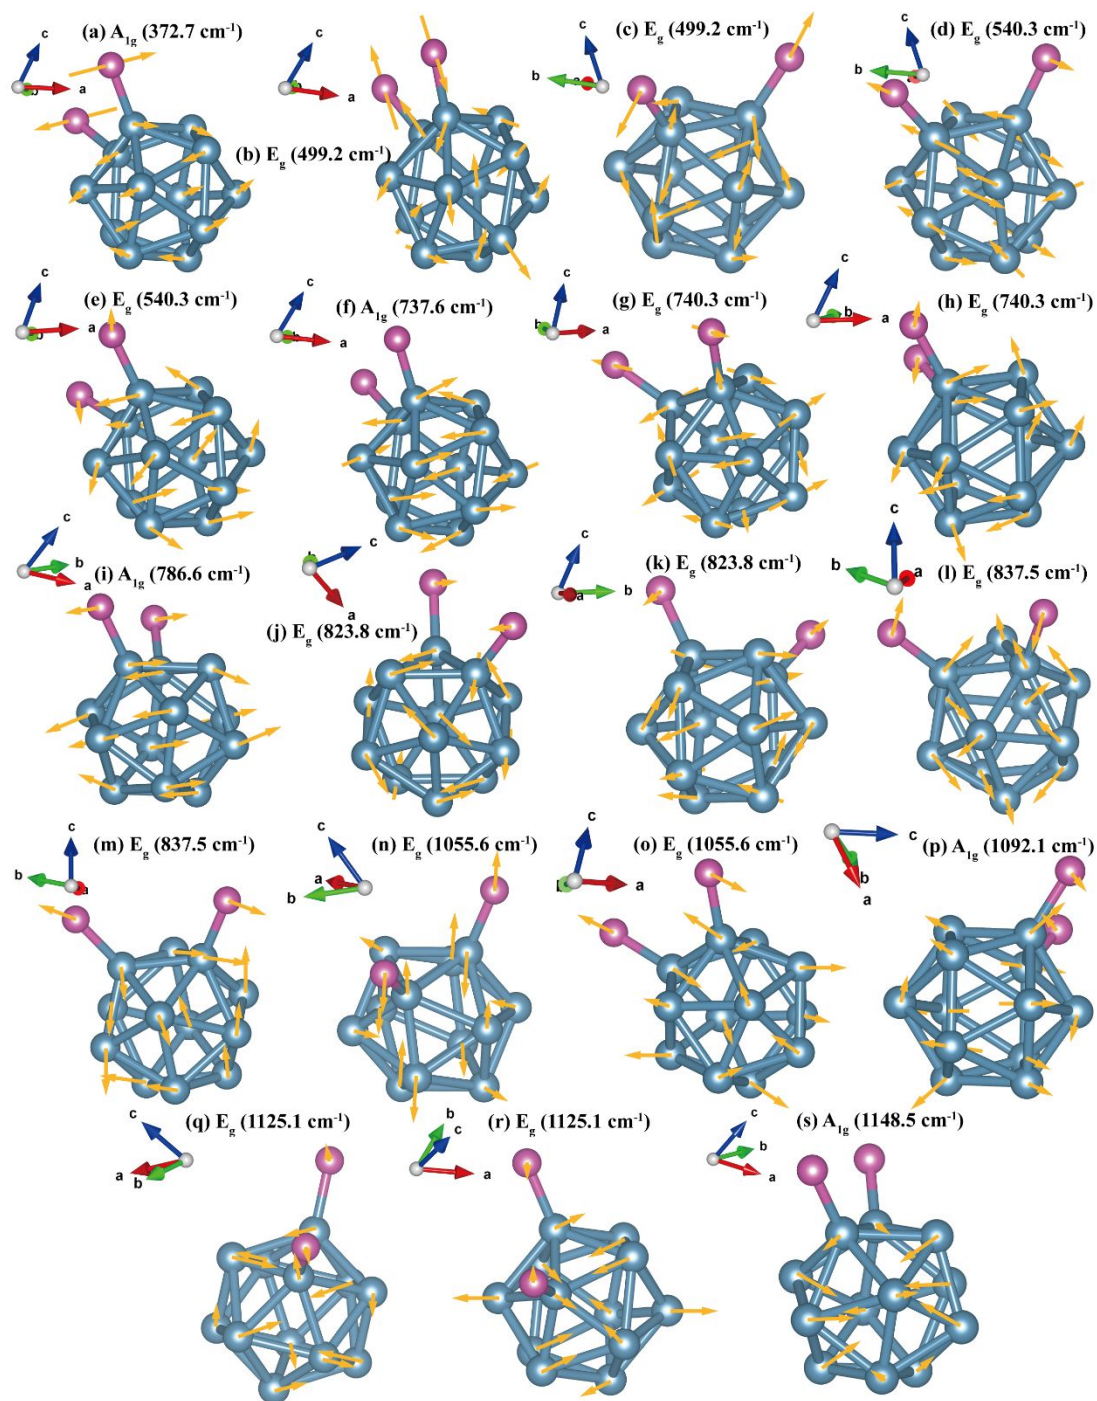

**Figure S5.** Calculated Raman modes and frequencies of B<sub>6</sub>O crystal. Atom color scheme: B: blue, O: pink.



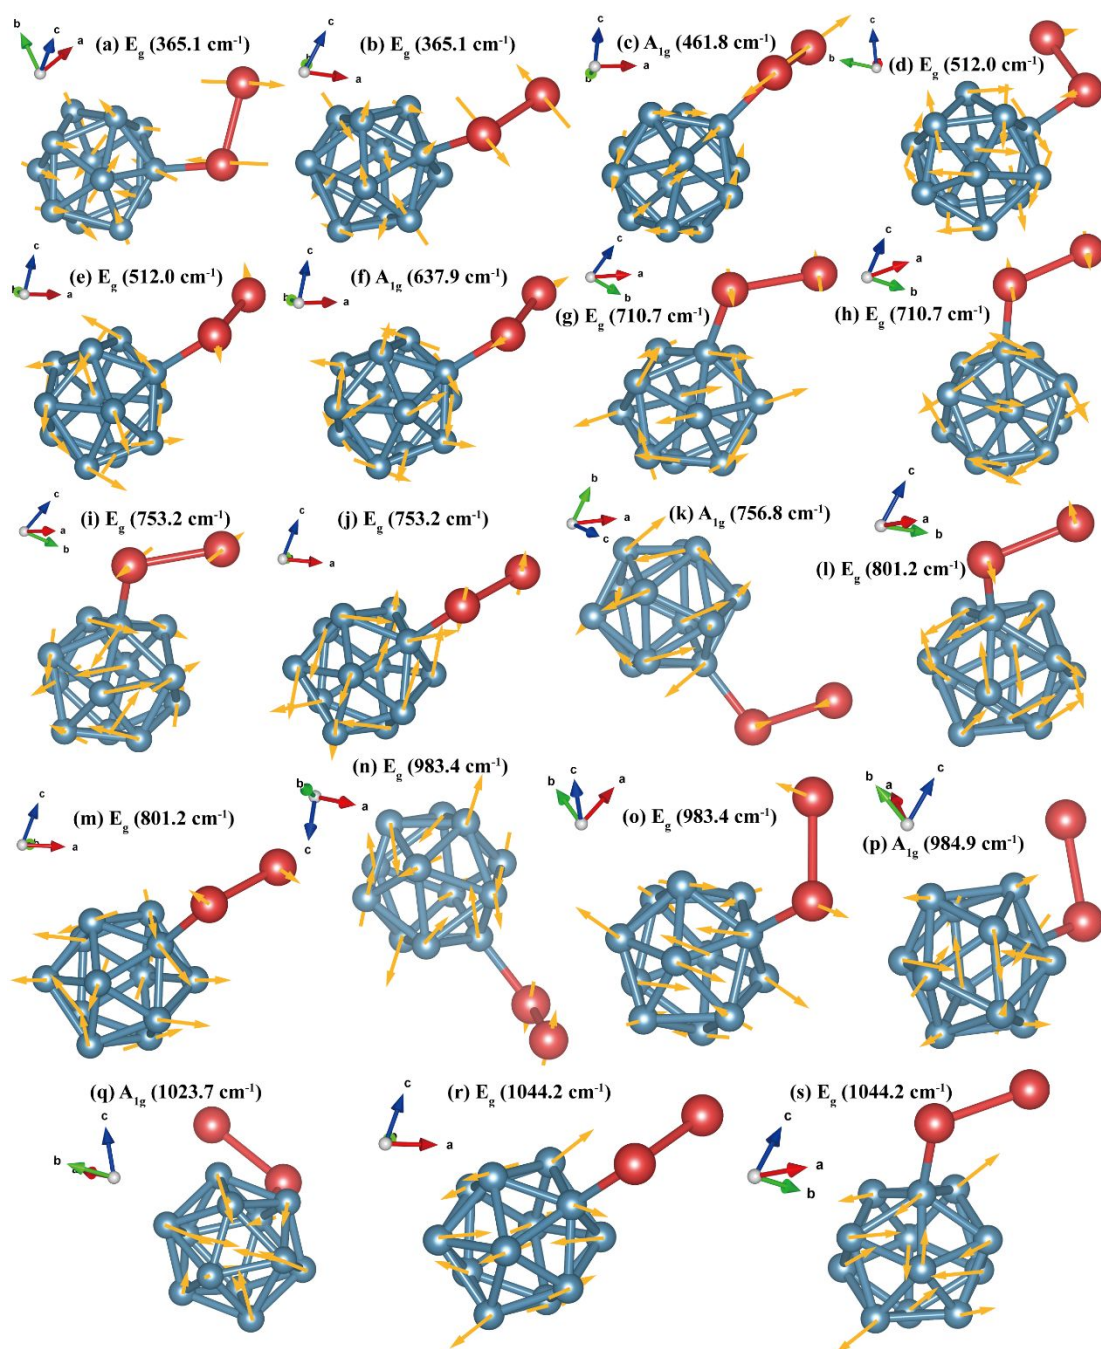

**Figure S6.** Calculated Raman modes and frequencies of  $B_{12}P_2$  crystal. Atom color scheme: B: blue, P: red.
